# Supplementary material for: Upregulation of KIF20A promotes tumor proliferation and invasion in renal clear cell carcinoma and is associated with adverse clinical outcome
Source: Aging (Albany NY). 2020 Nov 24;12(24):25878–94. doi: 10.18632/aging.202153 (PMC7803492; doi:10.18632/aging.202153)
Supplement: Supplementary Table 1 [file aging-12-202153-s001.pdf]

## Supplementary Table

**Supplementary Table 1. Correlation between KIF20A expression and clinicopathologic characteristics of ccRCC patients.**

| Clinical characteristics | KIF20A expression          |                     |
|--------------------------|----------------------------|---------------------|
|                          | Low or none, no. cases (%) | High, no. cases (%) |
| Age (y)                  |                            |                     |
| ≤60                      | 129 (24.3%)                | 135 (25.5%)         |
| >60                      | 136 (25.7%)                | 130 (24.5%)         |
| Gender                   |                            |                     |
| Male                     | 151 (28.5%)                | 193 (36.4%)         |
| Female                   | 114 (21.5%)                | 72 (13.6%)          |
| Grade                    |                            |                     |
| G1                       | 10 (1.9%)                  | 4 (0.8%)            |
| G2                       | 141 (26.7%)                | 86 (16.2%)          |
| G3                       | 91 (17.1%)                 | 115 (21.7%)         |
| G4                       | 17 (3.2%)                  | 58 (10.9%)          |
| GX (or unknow)           | 6 (1.1%)                   | 0 (0%)              |
| Clinical stage           |                            |                     |
| Stage I                  | 166 (31.3%)                | 99 (18.7%)          |
| Stage II                 | 35 (6.6%)                  | 22 (4.2%)           |
| Stage III                | 44 (8.3%)                  | 79 (14.9%)          |
| Stage IV                 | 20 (3.8%)                  | 62 (11.7%)          |
| Unknow                   | 0 (0%)                     | 3 (0.6%)            |
| T classification         |                            |                     |
| T1                       | 169 (31.9%)                | 102 (19.2%)         |
| T2                       | 40 (7.5%)                  | 29 (5.5%)           |
| T3                       | 55 (10.4%)                 | 124 (23.4%)         |
| T4                       | 1 (0.2%)                   | 10 (1.9%)           |
| N classification         |                            |                     |
| N0                       | 116 (21.9%)                | 123 (23.2%)         |
| N1                       | 1 (0.2%)                   | 15 (2.8%)           |
| NX                       | 148 (27.9%)                | 127 (24.0%)         |
| M classification         |                            |                     |
| M0                       | 220 (41.5%)                | 200 (37.7%)         |
| M1                       | 18 (3.4%)                  | 60 (11.3%)          |
| MX (or unknow)           | 27 (5.1%)                  | 5 (0.9%)            |
